# Supplementary material for: Mycobacterium tuberculosis arrests host cycle at the G1/S transition to establish long term infection
Source: PubMed Central journal article supplement (PMC5456404; doi:10.1371/journal.ppat.1006389), 2017-05-22
Supplement: ppat.1006389.s003.pdf [file ppat.1006389.s003.pdf]

## A. Cell cycle Regulation of G1/S transition

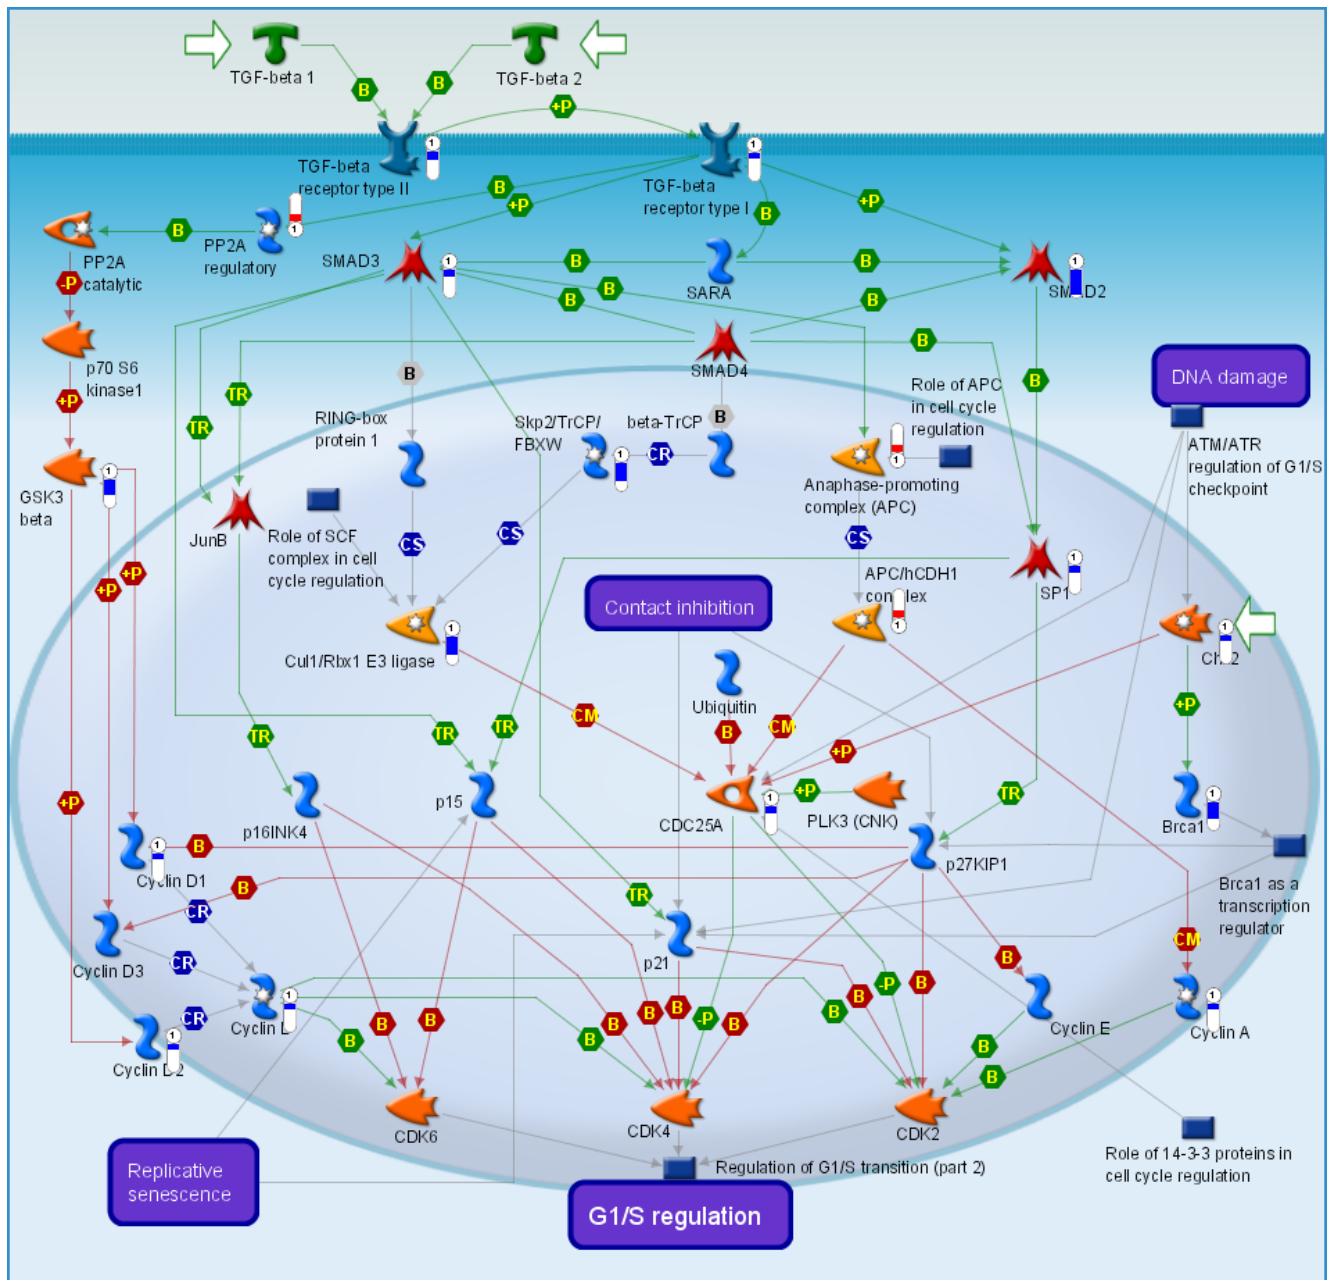

| Gene Symbol | Protein     | Class | Protein name                          | Fold Change |
|-------------|-------------|-------|---------------------------------------|-------------|
| ANAPC1      | Protein     |       | Anaphase-promoting complex subunit 1  |             |
| ANAPC10     | APC1_HUMAN  |       | Anaphase-promoting complex subunit 10 |             |
| ANAPC11     | APC10_HUMAN |       | Anaphase-promoting complex subunit 11 |             |
| ANAPC13     | APC11_HUMAN |       | Anaphase-promoting complex subunit 13 |             |
| ANAPC2      | APC13_HUMAN |       | Anaphase-promoting complex subunit 2  |             |

|        |             |  |                                                      |       |
|--------|-------------|--|------------------------------------------------------|-------|
| ANAPC4 | ANC2_HUMAN  |  | Anaphase-promoting complex subunit 4                 |       |
| ANAPC5 | APC4_HUMAN  |  | Anaphase-promoting complex subunit 5                 |       |
| ANAPC7 | APC5_HUMAN  |  | Anaphase-promoting complex subunit 7                 |       |
| BRCA1  | APC7_HUMAN  |  | Breast cancer type 1 susceptibility protein          | -5.38 |
| BTRC   | BRCA1_HUMAN |  | F-box/WD repeat-containing protein 1A                |       |
| CCNA1  | FBW1A_HUMAN |  | Cyclin-A1.                                           |       |
| CCNA2  | CCNA1_HUMAN |  | Cyclin-A2                                            | -1.72 |
| CCND1  | CCNA2_HUMAN |  | G1/S-specific cyclin-D1                              | -1.78 |
| CCND2  | CCND1_HUMAN |  | G1/S-specific cyclin-D2.                             | -1.79 |
| CCND3  | CCND2_HUMAN |  | G1/S-specific cyclin-D3.                             |       |
| CCNE1  | CCND3_HUMAN |  | G1/S-specific cyclin-E1.                             |       |
| CDC16  | CCNE1_HUMAN |  | Cell division cycle protein 16 homolog               |       |
| CDC23  | CDC16_HUMAN |  | Cell division cycle protein 23 homolog               |       |
| CDC25A | CDC23_HUMAN |  | M-phase inducer phosphatase 1                        | -2.02 |
| CDC26  | MPIP1_HUMAN |  | Anaphase-promoting complex subunit CDC26             |       |
| CDC27  | CDC26_HUMAN |  | Cell division cycle protein 27 homolog               | 2.05  |
| CDK2   | CDC27_HUMAN |  | Cell division protein kinase 2                       |       |
| CDK4   | CDK2_HUMAN  |  | Cell division protein kinase 4                       |       |
| CDK6   | CDK4_HUMAN  |  | Cell division protein kinase 6                       |       |
| CDKN1A | CDK6_HUMAN  |  | Cyclin-dependent kinase inhibitor 1                  |       |
| CDKN1B | CDN1A_HUMAN |  | Cyclin-dependent kinase inhibitor 1B                 |       |
| CDKN2A | CDN1B_HUMAN |  | Cyclin-dependent kinase inhibitor 2A, isoforms 1/2/3 |       |
|        | CD2A1_HUMAN |  | Cyclin-dependent kinase inhibitor 2A, isoform 4      |       |
| CDKN2B | CD2A2_HUMAN |  | Cyclin-dependent kinase 4 inhibitor B                |       |
| CHEK2  | CDN2B_HUMAN |  | Serine/threonine-protein kinase Chk2                 | -1.75 |
| CUL1   | CHK2_HUMAN  |  | Cullin-1                                             |       |
| FBXW11 | CUL1_HUMAN  |  | F-box/WD repeat-containing protein 11                |       |
| FBXW7  | FBW1B_HUMAN |  | F-box/WD repeat-containing protein 7                 | -5.77 |

|         |             |                                                                                     |                                                                                   |       |
|---------|-------------|-------------------------------------------------------------------------------------|-----------------------------------------------------------------------------------|-------|
| FZR1    | FBXW7_HUMAN |    | Fuzzy-related protein homolog                                                     |       |
| GSK3B   | FZR_HUMAN   |    | Glycogen synthase kinase-3 beta                                                   | -4.81 |
| JUNB    | GSK3B_HUMAN |    | Transcription factor jun-B.                                                       |       |
| PLK3    | JUNB_HUMAN  |    | Serine/threonine-protein kinase PLK3                                              |       |
| PPP2CA  | PLK3_HUMAN  |    | Serine/threonine-protein phosphatase 2A catalytic subunit alpha isoform           |       |
| PPP2CB  | PP2AA_HUMAN |    | Serine/threonine-protein phosphatase 2A catalytic subunit beta isoform            |       |
| PPP2R2A | PP2AB_HUMAN |    | Serine/threonine-protein phosphatase 2A 55 kDa regulatory subunit B alpha isoform |       |
| PPP2R2B | 2ABA_HUMAN  |    | Serine/threonine-protein phosphatase 2A 55 kDa regulatory subunit B beta isoform  |       |
| PPP2R2C | 2ABB_HUMAN  |    | Serine/threonine-protein phosphatase 2A 55 kDa regulatory subunit B gamma isoform |       |
| PPP2R3A | 2ABG_HUMAN  |    | Serine/threonine-protein phosphatase 2A regulatory subunit B'' subunit alpha      |       |
| PPP2R3B | P2R3A_HUMAN |  | Serine/threonine-protein phosphatase 2A regulatory subunit B'' subunit beta       |       |
| PPP2R4  | P2R3B_HUMAN |  | Serine/threonine-protein phosphatase 2A regulatory subunit B'                     |       |
| PPP2R5A | PTPA_HUMAN  |  | Serine/threonine-protein phosphatase 2A 56 kDa regulatory subunit alpha isoform   | 2.11  |
| PPP2R5B | 2A5A_HUMAN  |  | Serine/threonine-protein phosphatase 2A 56 kDa regulatory subunit beta isoform    |       |
| PPP2R5C | 2A5B_HUMAN  |  | Serine/threonine-protein phosphatase 2A 56 kDa regulatory subunit gamma isoform   |       |
| PPP2R5D | 2A5G_HUMAN  |  | Serine/threonine-protein phosphatase 2A 56 kDa regulatory subunit delta isoform   |       |
| PPP2R5E | 2A5D_HUMAN  |  | Serine/threonine-protein phosphatase 2A 56 kDa regulatory subunit epsilon isoform |       |
| RBX1    | 2A5E_HUMAN  |  | RING-box protein 1                                                                |       |
| RPS27A  | RBX1_HUMAN  |  | 40S ribosomal protein S27a.                                                       |       |
| RPS6KB1 | RS27A_HUMAN |  | Ribosomal protein S6 kinase beta-1                                                |       |
| SKP1    | KS6B1_HUMAN |  | S-phase kinase-associated protein 1                                               |       |
| SKP2    | SKP1_HUMAN  |  | S-phase kinase-associated protein 2                                               | -1.91 |

|        |             |                                                                                     |                                              |       |
|--------|-------------|-------------------------------------------------------------------------------------|----------------------------------------------|-------|
| SMAD2  | SKP2_HUMAN  |    | Mothers against decapentaplegic homolog 2    | -8.03 |
| SMAD3  | SMAD2_HUMAN |    | Mothers against decapentaplegic homolog 3    | -2.23 |
| SMAD4  | SMAD3_HUMAN |    | Mothers against decapentaplegic homolog 4    |       |
| SP1    | SMAD4_HUMAN |    | Transcription factor Sp1.                    | -1.97 |
| TGFB1  | SP1_HUMAN   |    | Transforming growth factor beta-1 precursor  |       |
| TGFB2  | TGFB1_HUMAN |    | Transforming growth factor beta-2 precursor  |       |
| TGFBR1 | TGFB2_HUMAN |    | TGF-beta receptor type-1 precursor           | -1.76 |
| TGFBR2 | TGFR1_HUMAN |    | TGF-beta receptor type-2 precursor           | -2.54 |
| UBA52  | TGFR2_HUMAN |    | Ubiquitin.                                   |       |
|        | UBIQ_HUMAN  |    | 60S ribosomal protein L40                    |       |
| UBB    | RL40_HUMAN  |    | Ubiquitin.                                   |       |
| ZFYVE9 | UBIQ_HUMAN  |  | Zinc finger FYVE domain-containing protein 9 |       |

## B Cytoskeleton remodeling fibronectin-binding integrins in cell motility

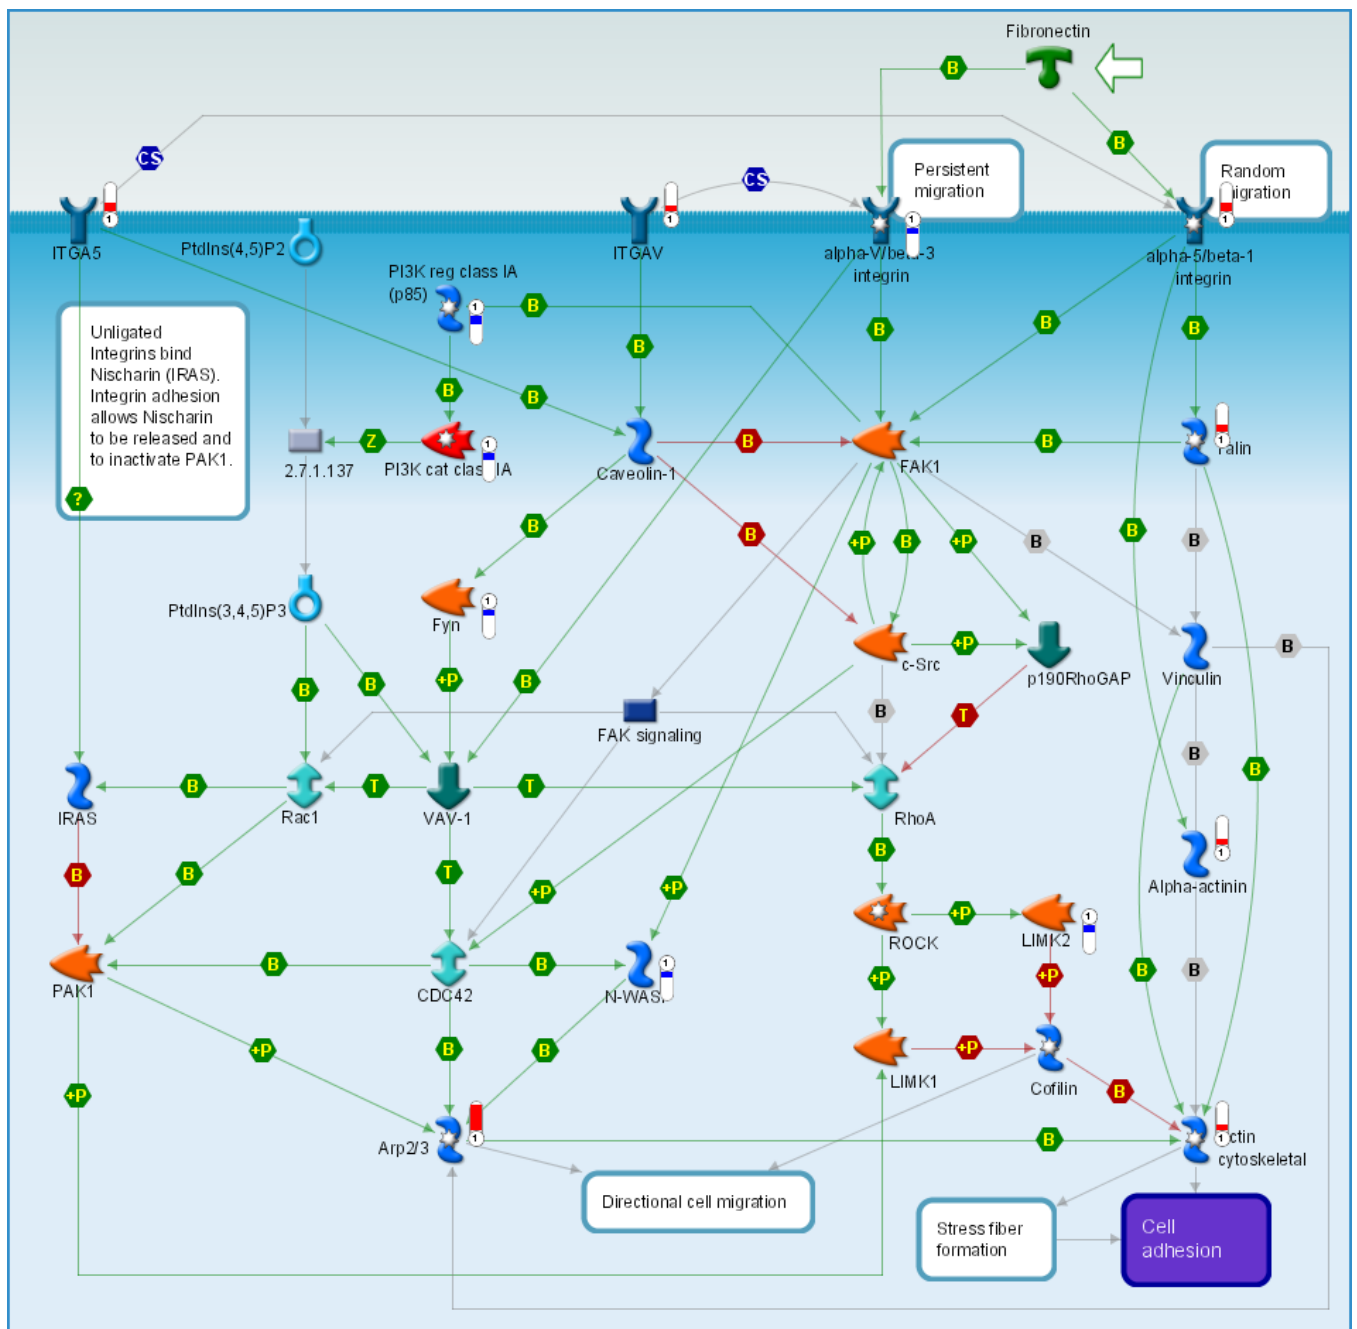

| Gene Symbol | Protein     | Class | Protein name         | Fold Change |
|-------------|-------------|-------|----------------------|-------------|
| ACTB        | ACTB_HUMAN  |       | Actin, cytoplasmic 1 | 1.83        |
| ACTG1       | ACTG_HUMAN  |       | Actin, cytoplasmic 2 |             |
| ACTN1       | ACTN1_HUMAN |       | Alpha-actinin-1      |             |
| ACTN2       | ACTN2_HUMAN |       | Alpha-actinin-2      |             |

|        |             |                                                                                     |                                                    |       |
|--------|-------------|-------------------------------------------------------------------------------------|----------------------------------------------------|-------|
| ACTN3  | ACTN3_HUMAN |    | Alpha-actinin-3                                    |       |
| ACTN4  | ACTN4_HUMAN |    | Alpha-actinin-4                                    | 1.97  |
| ACTR2  | ARP2_HUMAN  |    | Actin-related protein 2                            |       |
| ACTR3  | ARP3_HUMAN  |    | Actin-related protein 3                            |       |
| ACTR3B | ACTR3B      |    | ARP3 actin-related protein 3 homolog B (yeast)     |       |
| ARPC1A | ARC1A_HUMAN |    | Actin-related protein 2/3 complex subunit 1A       |       |
| ARPC1B | ARC1B_HUMAN |    | Actin-related protein 2/3 complex subunit 1B       |       |
| ARPC2  | ARPC2_HUMAN |    | Actin-related protein 2/3 complex subunit 2        |       |
| ARPC3  | ARPC3_HUMAN |    | Actin-related protein 2/3 complex subunit 3        |       |
| ARPC4  | ARPC4_HUMAN |    | Actin-related protein 2/3 complex subunit 4        |       |
| ARPC5  | ARPC5_HUMAN |  | Actin-related protein 2/3 complex subunit 5        | 9.43  |
| CAV1   | CAV1_HUMAN  |  | Caveolin-1.                                        |       |
| CDC42  | CDC42_HUMAN |  | Cell division control protein 42 homolog precursor |       |
| CFL1   | COF1_HUMAN  |  | Cofilin-1                                          |       |
| CFL2   | COF2_HUMAN  |  | Cofilin-2                                          |       |
| FN1    | FINC_HUMAN  |  | Fibronectin precursor                              |       |
| FYN    | FYN_HUMAN   |  | Proto-oncogene tyrosine-protein kinase Fyn         | -1.93 |
| GRLF1  | GRLF1_HUMAN |  | Glucocorticoid receptor DNA-binding factor 1       |       |
| ITGA5  | ITA5_HUMAN  |  | Integrin alpha-5 precursor                         | 2.82  |
| ITGAV  | ITAV_HUMAN  |  | Integrin alpha-V precursor                         | 1.93  |
| ITGB1  | ITB1_HUMAN  |  | Integrin beta-1 precursor                          |       |
| ITGB3  | ITB3_HUMAN  |  | Integrin beta-3 precursor                          | -2    |
| LIMK1  | LIMK1_HUMAN |  | LIM domain kinase 1                                |       |
| LIMK2  | LIMK2_HUMAN |  | LIM domain kinase 2                                | -2.5  |

| LOC643751 |             |                                                                                     |                                                                                |       |
|-----------|-------------|-------------------------------------------------------------------------------------|--------------------------------------------------------------------------------|-------|
| NISCH     | NISCH       |    | Nischarin                                                                      |       |
| PAK1      | PAK1_HUMAN  |    | Serine/threonine-protein kinase PAK 1                                          |       |
| PIK3CA    | PK3CA_HUMAN |    | Phosphatidylinositol-4,5-bisphosphate 3-kinase catalytic subunit alpha isoform | -2.4  |
| PIK3CB    | PK3CB_HUMAN |    | Phosphatidylinositol-4,5-bisphosphate 3-kinase catalytic subunit beta isoform  | 2.01  |
| PIK3CD    | PK3CD_HUMAN |    | Phosphatidylinositol-4,5-bisphosphate 3-kinase catalytic subunit delta isoform |       |
| PIK3R1    | P85A_HUMAN  |    | Phosphatidylinositol 3-kinase regulatory subunit alpha                         | -3.02 |
| PIK3R2    | P85B_HUMAN  |    | Phosphatidylinositol 3-kinase regulatory subunit beta                          | -1.91 |
| PTK2      | FAK1_HUMAN  |    | Focal adhesion kinase 1                                                        |       |
| RAC1      | RAC1_HUMAN  |    | Ras-related C3 botulinum toxin substrate 1 precursor                           |       |
| RHOA      | RHOA_HUMAN  |  | Transforming protein RhoA precursor                                            |       |
| ROCK1     | ROCK1_HUMAN |  | Rho-associated protein kinase 1                                                |       |
| ROCK2     | ROCK2_HUMAN |  | Rho-associated protein kinase 2                                                |       |
| SRC       | SRC_HUMAN   |  | Proto-oncogene tyrosine-protein kinase Src                                     |       |
| TLN1      | TLN1_HUMAN  |  | Talin-1.                                                                       | 2.31  |
| TLN2      | TLN2_HUMAN  |  | Talin-2.                                                                       |       |
| VAV1      | VAV_HUMAN   |  | Proto-oncogene vav.                                                            |       |
| VCL       | VINC_HUMAN  |  | Vinculin                                                                       |       |
| WASL      | WASL_HUMAN  |  | Neural Wiskott-Aldrich syndrome protein                                        | -1.72 |
